# Supplementary material for: Effect of bovine milk fat globule membranes as a complementary food on the serum metabolome and immune markers of 6-11-month-old Peruvian infants
Source: PubMed Central journal article supplement (PMC6550191; doi:10.1038/s41538-018-0014-8), 2018-04-12
Supplement: 41538_2018_14_MOESM1_ESM.pdf [file 41538_2018_14_MOESM1_ESM.pdf]

Supplementary Figures/Tables for

**Effect of bovine milk fat globule membranes as a complementary food on the serum  
metabolome and immune markers of 6-11-month-old Peruvian infants**

Hanna Lee<sup>1</sup>, Nelly Zavaleta<sup>2</sup>, Shin-Yu Chen, Bo Lönnerdal<sup>3</sup>, Carolyn Slupsky\*<sup>1, 3</sup>

<sup>1</sup>*Department of Food Science and Technology, University of California-Davis, CA, USA*

<sup>2</sup>*Instituto de Investigación Nutricional, Lima, Peru 18-0191*

<sup>3</sup>*Department of Nutrition, University of California-Davis, CA, USA*

**Supplementary Table S1.** Amino acid composition of the protein fraction of each powder meal. Complementary powder meals were given twice daily (40 g/d) in addition to the regular meals of infants.

| Amino acid    | unit | Calculated on<br>estimated g /100 g powder |                    |
|---------------|------|--------------------------------------------|--------------------|
|               |      | Control food                               | MFGM-enriched food |
| Isoleucine    | (g)  | 0.8184                                     | 0.7645             |
| Leucine       | (g)  | 1.3995                                     | 1.5692             |
| Lysine        | (g)  | 1.2685                                     | 1.3601             |
| Methionine    | (g)  | 0.3601                                     | 0.2915             |
| Cysteine      | (g)  | 0.1105                                     | 0.4541             |
| Phenylalanine | (g)  | 0.7366                                     | 0.5681             |
| Tyrosine      | (g)  | 0.6138                                     | 0.5111             |
| Threonine     | (g)  | 0.622                                      | 0.9567             |
| Tryptophan    | (g)  | 0.1923                                     | 0.2598             |
| Valine        | (g)  | 0.9821                                     | 0.8554             |
| Arginine      | (g)  | 0.491                                      | 1.3580             |
| Histidine     | (g)  | 0.4051                                     | 0.3878             |
| Alanine       | (g)  | 0.491                                      | 0.7202             |
| Aspartic acid | (g)  | 1.1867                                     | 1.5016             |
| Glutamic acid | (g)  | 2.8644                                     | 2.3485             |
| Glycine       | (g)  | 0.2946                                     | 0.3612             |
| Proline       | (g)  | 1.3913                                     | 0.8195             |
| Serine        | (g)  | 0.8184                                     | 0.9757             |
| Sum           | (g)  | 15.05                                      | 16.06              |

**Supplementary Table S2.** The number of subjects included in data analysis for selected characteristics by treatment group. Fifty samples per each group were initially chosen by stratified random sampling, matched for age, the number of anemic subjects, and the number of females or males in each group. The samples with excessive dilution, or noisy spectra were excluded from the analysis, leaving 46 (MFGM group) and 45 (Control group) subjects respectively.

|                | <b>Total number of samples included<br/>in analysis</b> | <b>Age at entry</b><br>* | <b>Anemic</b> | <b>Sex (F / M)</b> |
|----------------|---------------------------------------------------------|--------------------------|---------------|--------------------|
| <b>MFGM</b>    | 46                                                      | 8.2 ± 1.8                | 24            | 18 / 28            |
| <b>Control</b> | 45                                                      | 8.5 ± 1.7                | 21            | 21 / 24            |

\*Average ± S.D.

**Supplementary Table S3.** The concentration of several metabolites differed between the MFGM and the control group in all, male (n = 28 (MFGM), 24 (control)) and female infants (n = 18 (MFGM), 21 (control)). Concentrations are reported in  $\mu\text{M}$  as median and interquartile range (3rd - 1st). IQR = interquartile range.

| Metabolite                              | All Infants |       |         |       | Male Infants |        |         |       | Female Infants |       |         |       |
|-----------------------------------------|-------------|-------|---------|-------|--------------|--------|---------|-------|----------------|-------|---------|-------|
|                                         | MFGM        |       | Control |       | MFGM         |        | Control |       | MFGM           |       | Control |       |
|                                         | Median      | IQR   | Median  | IQR   | Median       | IQR    | Median  | IQR   | Median         | IQR   | Median  | IQR   |
| <b><i>Essential amino acids</i></b>     |             |       |         |       |              |        |         |       |                |       |         |       |
| Isoleucine                              | 86.7        | 35.4  | 78.3    | 34    | 87.1         | 36.4   | 84.9    | 43.3  | 84.3           | 27.8  | 73.7    | 23.6  |
| Leucine                                 | 136.4       | 67    | 119.3   | 56    | 136.3        | 53.1   | 129.2   | 55.7  | 144.6          | 63.1  | 106.8   | 41.9  |
| Lysine                                  | 179.6       | 55.5  | 164.3   | 37.8  | 177.6        | 70.7   | 162.6   | 55.2  | 193.0          | 36.8  | 164.3   | 28.9  |
| Phenylalanine                           | 57.1        | 21.5  | 58.2    | 18.8  | 57.1         | 14.1   | 61.1    | 22.9  | 62.2           | 25.6  | 56.2    | 11.3  |
| Threonine                               | 135.2       | 54.5  | 123.8   | 38.6  | 118.8        | 55.4   | 126.1   | 43.6  | 145.2          | 25.0  | 115.1   | 32.2  |
| Valine                                  | 250         | 94.9  | 216     | 76.3  | 247.9        | 100.7  | 221.3   | 72.4  | 251.8          | 72.7  | 216.0   | 71.4  |
| <b><i>Non-essential amino acids</i></b> |             |       |         |       |              |        |         |       |                |       |         |       |
| Alanine                                 | 448.1       | 93.3  | 424.1   | 167.5 | 456.7        | 113    | 458.9   | 150.8 | 439.4          | 149.8 | 374.4   | 137.9 |
| Arginine                                | 179.3       | 57.6  | 158.7   | 58.1  | 166.6        | 44.1   | 157.8   | 53.9  | 201.6          | 49.4  | 166.1   | 64.7  |
| Asparagine                              | 13.3        | 7.7   | 15.7    | 9.6   | 15.6         | 7.7    | 17.0    | 9.3   | 13.1           | 6.9   | 13.9    | 6.6   |
| Proline                                 | 277.6       | 98    | 257.7   | 93.6  | 257.2        | 101.7  | 264.7   | 82.0  | 279.0          | 1060  | 236.9   | 103.3 |
| Serine                                  | 206.6       | 46.2  | 206     | 33.4  | 201.8        | 46.4   | 204.5   | 40.4  | 212.6          | 46.7  | 211.4   | 29.9  |
| Tyrosine                                | 93.3        | 32.4  | 85.9    | 27.3  | 93.2         | 33.3   | 85.6    | 46.8  | 98.3           | 26.8  | 88.3    | 24.5  |
| <b><i>Urea cycle intermediates</i></b>  |             |       |         |       |              |        |         |       |                |       |         |       |
| Ornithine                               | 66.1        | 23.2  | 60.6    | 21.4  | 61.2         | 25.4   | 67.6    | 23.7  | 72.7           | 10.1  | 59.6    | 13.6  |
| Urea                                    | 2003.4      | 936.4 | 1423.9  | 676.7 | 1999.6       | 1010.8 | 1513.9  | 702.7 | 2007.2         | 844.1 | 1402.0  | 583.9 |
| <b><i>Ketone body metabolites</i></b>   |             |       |         |       |              |        |         |       |                |       |         |       |
| Acetone                                 | 26.9        | 16.6  | 30.7    | 51.7  | 27.1         | 17.1   | 28.3    | 14.9  | 24.7           | 21.7  | 65.6    | 85.8  |
| 3-OHB                                   | 60.4        | 80.7  | 82.6    | 199.4 | 49.4         | 80.1   | 60.9    | 66.0  | 72.9           | 109.9 | 215.1   | 302.8 |
| <b><i>Other metabolites</i></b>         |             |       |         |       |              |        |         |       |                |       |         |       |
| Aspartate                               | 75.5        | 24.9  | 73.7    | 19.2  | 73.1         | 19.4   | 73.6    | 19.5  | 86.0           | 37.1  | 75.3    | 19.2  |
| Creatine                                | 75          | 24.4  | 70.5    | 21    | 83.0         | 24.6   | 73.0    | 16.5  | 70.2           | 12.8  | 65.3    | 19.7  |
| Choline                                 | 36          | 15    | 29.7    | 13.3  | 35.0         | 10.4   | 30.8    | 12.1  | 44.9           | 14.6  | 26.6    | 16.7  |
| DMA                                     | 4.1         | 1.1   | 3.8     | 1.2   | 4.2          | 0.8    | 3.9     | 1.3   | 3.9            | 1.1   | 3.8     | 0.9   |
| Mannose                                 | 35.6        | 12.1  | 30.8    | 10.1  | 36.1         | 13.0   | 30.9    | 8.9   | 32.9           | 10.3  | 29.9    | 13.8  |
| N,N-DMG                                 | 4.7         | 3.9   | 5.2     | 5     | 4.4          | 2.8    | 6.1     | 4.7   | 5.1            | 4.1   | 4.6     | 3.9   |
| PG                                      | 5.4         | 16.3  | 8.4     | 21.1  | 5.8          | 25.4   | 10.1    | 33.1  | 3.4            | 4.2   | 8.3     | 10.9  |
| Pyroglutamate                           | 137.6       | 59.3  | 117.4   | 52.6  | 125.9        | 40.2   | 117.4   | 38.6  | 175.6          | 56.0  | 115.8   | 62.8  |
| Succinate                               | 10.2        | 3.9   | 9.6     | 2.6   | 10.1         | 4.0    | 9.0     | 2.9   | 10.8           | 4.1   | 9.7     | 1.9   |
| Taurine                                 | 129.5       | 57.1  | 108.8   | 59.3  | 126.6        | 54.3   | 109.9   | 65.8  | 151.6          | 60.9  | 103.6   | 77.1  |
| TMAO                                    | 4.3         | 2.4   | 7.8     | 2.9   | 4.2          | 2.2    | 7.5     | 2.2   | 4.8            | 2.6   | 8.2     | 2.7   |

Abbreviations: 3-Hydroxybutyrate (3-OHB), Dimethylamine (DMA), N,N-Dimethylglycine (N,N-DMG), Propylene glycol (PG), Trimethylamine-N-oxide (TMAO).

**Supplementary Table S4.** The metabolites with identified sex effect were analyzed by a linear regression model with sex and diet as fixed effect factors, and significance of diet (MFGM supplementation) adjusted for sex was computed. Additional statistics from the linear model as well as the slope coefficient estimates for Sex.Male effect (the magnitude of metabolite-level changes when the fixed class variable changes from female to male) and Diet.MFGM effect are summarized.

| Metabolite                              | Adjusted R <sup>2</sup> | F-statistics | Intercept | p-value for Sex    | p-value for Sex*Diet | Estimated slope coeff. for Sex.male | Estimated slope coeff. for Diet.MFGM |
|-----------------------------------------|-------------------------|--------------|-----------|--------------------|----------------------|-------------------------------------|--------------------------------------|
| <b><u>Essential amino acids</u></b>     |                         |              |           |                    |                      |                                     |                                      |
| Isoleucine                              | -0.002                  | 0.952        | 1.868     | 0.252              | 0.295                | 0.051                               | 0.074                                |
| Leucine                                 | 0.018                   | 1.541        | 2.064     | 0.370              | 0.195                | 0.039                               | 0.098                                |
| Lysine                                  | 0.020                   | 1.603        | 2.210     | 0.746              | 0.186                | 0.011                               | 0.075                                |
| Phenylalanine                           | 0.007                   | 1.205        | 1.732     | 0.303              | 0.230                | 0.036                               | 0.070                                |
| Threonine                               | -0.006                  | 0.839        | 2.077     | 0.742              | 0.418                | 0.013                               | 0.062                                |
| Valine                                  | 0.011                   | 1.313        | 2.319     | 0.232              | 0.223                | 0.045                               | 0.076                                |
| <b><u>Non-essential amino acids</u></b> |                         |              |           |                    |                      |                                     |                                      |
| Alanine                                 | 0.011                   | 1.313        | 2.319     | 0.232              | 0.223                | 0.045                               | 0.076                                |
| Arginine                                | 0.062                   | 2.900        | 2.236     | 0.404              | 0.337                | -0.027                              | 0.070                                |
| Asparagine                              | 0.008                   | 1.241        | 1.146     | 0.173              | 0.330                | 0.094                               | -0.013                               |
| Proline                                 | 0.018                   | 1.528        | 2.385     | 0.202              | 0.070 <sup>#</sup>   | 0.047                               | 0.084                                |
| Serine                                  | -0.018                  | 0.479        | 2.333     | 0.527              | 0.779                | -0.015                              | 0.006                                |
| Tyrosine                                | 0.016                   | 1.462        | 1.926     | 0.067 <sup>#</sup> | 0.084 <sup>#</sup>   | 0.067                               | 0.069                                |
| <b><u>Urea cycle intermediates</u></b>  |                         |              |           |                    |                      |                                     |                                      |
| Ornithine                               | 0.023                   | 1.688        | 1.773     | 0.222              | 0.045*               | 0.045                               | 0.086                                |
| Urea                                    | 0.047                   | 2.442        | 3.136     | 0.598              | 0.873                | 0.031                               | 0.115                                |
| <b><u>Ketone body metabolites</u></b>   |                         |              |           |                    |                      |                                     |                                      |
| Acetone                                 | 0.071                   | 3.214        | 1.692     | 0.038*             | 0.200                | -0.219                              | -0.268                               |
| 3-OHB                                   | 0.092                   | 3.931        | 2.194     | 0.013*             | 0.218                | -0.366                              | -0.356                               |
| <b><u>Other metabolites</u></b>         |                         |              |           |                    |                      |                                     |                                      |
| Aspartate                               | 0.022                   | 1.662        | 1.862     | 0.813              | 0.099 <sup>#</sup>   | 0.008                               | 0.067                                |
| Creatine                                | 0.051                   | 2.561        | 1.819     | 0.356              | 0.548                | 0.029                               | 0.025                                |
| Choline                                 | 0.036                   | 2.084        | 1.526     | 0.487              | 0.605                | -0.039                              | 0.104                                |
| DMA                                     | -0.013                  | 0.633        | 0.527     | 0.807              | 0.891                | -0.014                              | 0.048                                |
| Mannose                                 | 0.042                   | 2.274        | 1.470     | 0.686              | 0.924                | 0.014                               | 0.064                                |
| N <sub>2</sub> N-DMG                    | -0.031                  | 0.130        | 0.696     | 0.629              | 0.572                | 0.039                               | 0.245                                |
| PG                                      | 0.029                   | 1.877        | 0.934     | 0.423              | 0.515                | 0.124                               | -0.253                               |
| Pyroglutamate                           | 0.019                   | 1.565        | 2.083     | 0.991              | 0.194                | -0.001                              | 0.097                                |
| Succinate                               | 0.020                   | 1.593        | 0.986     | 0.391              | 0.118                | -0.030                              | -0.010                               |
| Taurine                                 | 0.004                   | 1.113        | 1.991     | 0.210              | 0.106                | 0.071                               | 0.108                                |
| TMAO                                    | 0.317                   | 14.470       | 0.917     | 0.286              | 0.562                | -0.062                              | -0.288                               |

Group differences with approaching significance (<sup>#</sup> = 0.05 < P < 0.1) or significance (\* = 0.1 < P < 0.05) were noted.

**The residual plots** (as diagnostic plots) generated from the linear regression model were reported in the following data repository:

Click on the [link](#)

or go to:

<https://drive.google.com/drive/folders/0B3cVdIJxMYUOei1STHVrZUF0QkE?usp=sharing>



## A Metabolite Set Enrichment Analysis overview – serum

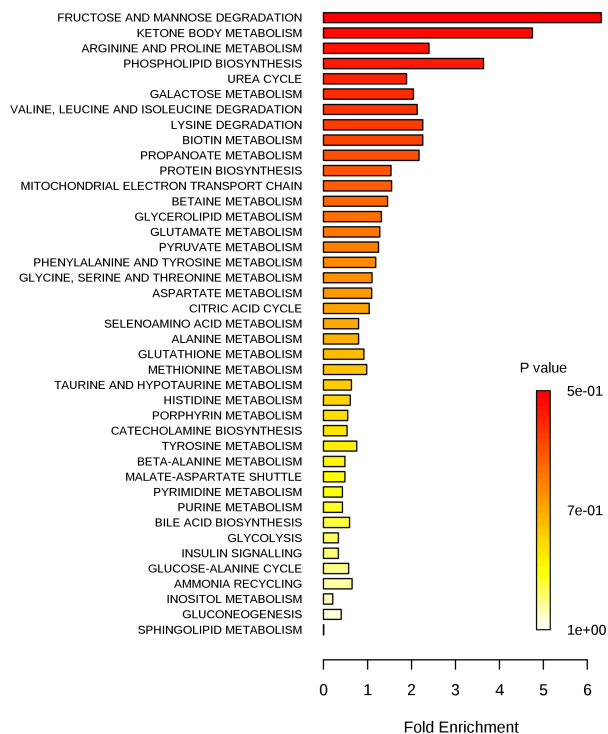

## B

| Rank | Metabolite set                             | Associated metabolites                                                     | Raw p    |
|------|--------------------------------------------|----------------------------------------------------------------------------|----------|
| 1    | Fructose and mannose degradation           | <b>Mannose</b>                                                             | 1.12E-02 |
| 2    | Ketone body metabolism                     | 3- Hydroxybutyric acid, Acetone                                            | 2.85E-02 |
| 3    | Arginine and proline metabolism            | <b>Arginine, urea, proline, creatine, creatinine, ornithine,</b> glutamine | 3.80E-02 |
| 4    | Phospholipid biosynthesis                  | <b>Choline</b>                                                             | 5.60E-02 |
| 5    | Urea cycle                                 | <b>Arginine, urea, ornithine,</b> glutamine                                | 8.51E-02 |
| 6    | Galactose metabolism                       | <b>Glycerol, mannose</b>                                                   | 8.98E-02 |
| 7    | Valine, leucine and isoleucine degradation | <b>Valine, leucine, 3-hydroxyisobutyric acid</b>                           | 1.30E-01 |
| 8    | Lysine degradation                         | <b>Lysine</b>                                                              | 1.34E-01 |
| 9    | Biotin metabolism                          | <b>Lysine</b>                                                              | 1.34E-01 |
| 10   | Propanoate metabolism                      | <b>Valine</b>                                                              | 1.41E-01 |
| 11   | Protein biosynthesis                       | <b>Proline, arginine, valine, leucine,</b> tyrosine, <b>phenylalanine,</b> | 1.66E-01 |
| 12   | Mitochondrial electron transport chain     | Fumaric acid, <b>succinic acid</b>                                         | 2.12E-01 |
| 13   | Betaine metabolism                         | <b>Choline,</b> methionine, dimethylglycine, betaine                       | 2.23E-01 |
| 14   | Glycerolipid metabolism                    | <b>Glycerol</b>                                                            | 2.54E-01 |

\*The metabolites higher in the MFGM group are highlighted in **bold and Italic**

**Supplementary Figure S6.** (A) Summary of Metabolite Set Enrichment Analysis (MSEA). *P* values are indicated as color (red: lowest *P* value) and fold enrichment as a length of each bar. (B) Associated metabolites that are enriched in a corresponding metabolite set. The metabolites higher in the MFGM group are highlighted in **bold and Italic**.

## A Metabolic Pathway Enrichment Analysis (MPEA) summary

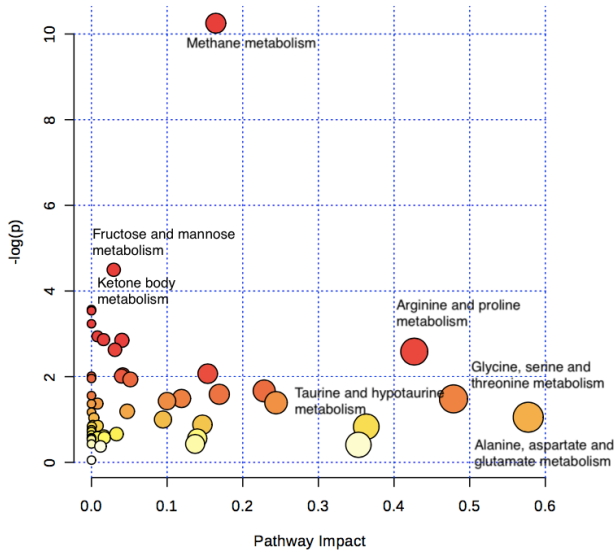

## B

| KEGG pathway                                | Associated metabolites                                                                            |
|---------------------------------------------|---------------------------------------------------------------------------------------------------|
| Methane metabolism                          | Trimethylamine-N-oxide, <b><i>dimethylamine</i></b> , formic acid                                 |
| Fructose and mannose metabolism             | Mannose                                                                                           |
| Pyrimidine metabolism                       | <b><i>Urea</i></b> , glutamine                                                                    |
| Synthesis and degradation of ketone bodies  | <b><i>3-Hydroxybutyric acid</i></b> , acetone                                                     |
| Amino sugar and nucleotide sugar metabolism | Glucose, mannose                                                                                  |
| Purine metabolism                           | Glycine, <b><i>urea</i></b> , glutamine                                                           |
| Propanoate metabolism                       | <b><i>Valine</i></b> , acetone, 2-hydroxybutyric acid, succinic acid, lactic acid                 |
| Butanoate metabolism                        | Succinic acid, fumaric acid, 3-hydroxybutyric acid                                                |
| Glycerophospholipid metabolism              | Glycerophosphocholine, choline                                                                    |
| Arginine and proline metabolism             | <b><i>Arginine, urea, proline</i></b> , creatine, creatinine, <b><i>ornithine</i></b> , glutamine |
| Glyoxylate and dicarboxylate metabolism     | Glycolic acid, formic acid, succinic acid, citric acid                                            |
| Valine, leucine and isoleucine degradation  | <b><i>Valine, leucine</i></b> , 3-hydroxyisobutyrate                                              |
| Valine, leucine and isoleucine biosynthesis | <b><i>Valine, leucine, isoleucine</i></b> , threonine                                             |
| Biotin metabolism                           | <b><i>Lysine</i></b>                                                                              |
| D-Arginine and D-ornithine metabolism       | <b><i>Arginine, ornithine</i></b> (L-form)                                                        |

\*The metabolites higher in the MFGM group are highlighted in **bold and italic**

**Supplementary Figure S7.** (A) Metabolic pathways significantly enriched by differences in the metabolome between the control and MFGM group. Enrichment scores are represented according to their  $\log(p)$  values (y-axis) and pathway impacts (x-axis). (B) The associated metabolites that "hit" the corresponding metabolites in a KEGG library pathway are listed.
